# Supplementary material for: SHAPE analysis of the htrA RNA thermometer from Salmonella enterica
Source: PubMed Central journal article supplement — RNA. 2017 Oct;23(10):1569–81. doi: 10.1261/rna.062299.117 (PMC5602114; doi:10.1261/rna.062299.117), 2017-10
Supplement: supp_062299.117_Supplemental_Materials.pdf [file supp_062299.117_Supplemental_Materials.pdf]

## Supplemental Table 1. Plasmids and oligonucleotides used.

### Plasmids:

| Name                           | Purpose/modification                                              | Source                |
|--------------------------------|-------------------------------------------------------------------|-----------------------|
| pBAD2- <i>bgaB-htrAp3</i>      | pBAD2- <i>bgaB</i> driven by <i>htrAp3</i> ; Ap <sup>r</sup>      | Klinkert, et al. 2012 |
| pBAD2- <i>bgaB-htrAp3-ΔC</i>   | pBAD2- <i>bgaB</i> driven by <i>htrAp3-ΔC</i> ; Ap <sup>r</sup>   | Klinkert, et al. 2012 |
| pBAD2- <i>bgaB-htrAp3-U25C</i> | pBAD2- <i>bgaB</i> driven by <i>htrAp3-U25C</i> ; Ap <sup>r</sup> | This work             |
| pUC19                          | Backbone for full-length <i>htrA</i> SHAPE template               | New England Biolabs   |
| <i>htrAp1-cass1</i> -pUC19     | Production of full-length <i>htrA</i> SHAPE template              | This work             |

### Primers and DNA oligonucleotides:

| Name     | Purpose                                                                           | Sequence                                                                                                                                                                                                                                                                                                                                                              |
|----------|-----------------------------------------------------------------------------------|-----------------------------------------------------------------------------------------------------------------------------------------------------------------------------------------------------------------------------------------------------------------------------------------------------------------------------------------------------------------------|
| 222      | 5' end of template for <i>htrA</i> RNA in SHAPE cassette, top strand              | 5'-TTCTAATACGACTCACTATAGGCCTTCGGGCCAAAC<br>AGCAATTTTGC GTTACCTGTTAATCGAGATTGAAAC                                                                                                                                                                                                                                                                                      |
| 223      | 3' end of template for <i>htrA</i> RNA in SHAPE cassette, bottom strand           | 5'-GAACCGGACCGAAGCCCGATTGGCTTCGGCGAACC<br>GAAGCTTTTTTCATGTGTTTCAATCTCGATTAACAGG                                                                                                                                                                                                                                                                                       |
| 224      | 5' end of template for ΔC <i>htrA</i> RNA in SHAPE cassette, top strand           | 5'-TTCTAATACGACTCACTATAGGCCTTCGGGCCAAAC<br>AGCAATTTTGGTTACCTGTTAATCGAGATTGAAAC                                                                                                                                                                                                                                                                                        |
| 225      | Reverse primer for SHAPE template                                                 | 5'-GAACCGGACCGAAGCCCG                                                                                                                                                                                                                                                                                                                                                 |
| 225-6FAM | SHAPE reaction primer, 5' 6-FAM label                                             | 5'-6-FAM-GAACCGGACCGAAGCCCG                                                                                                                                                                                                                                                                                                                                           |
| 225-VIC  | SHAPE sequencing primer, 5' VIC label                                             | 5'-VIC-GAACCGGACCGAAGCCCG                                                                                                                                                                                                                                                                                                                                             |
| 226      | Forward primer for SHAPE template                                                 | 5'-TTCTAATACGACTCACTATAGGCCTTCGGG                                                                                                                                                                                                                                                                                                                                     |
| 272      | 3' end of template for <i>htrA</i> RNA in alternate SHAPE cassette, bottom strand | 5'-GAACCGGACCGAAGCCCGATTGGATCCGGCGAACC<br>GGATCGATTTTCATGTGTTTCAATCTCGATTAACAGG                                                                                                                                                                                                                                                                                       |
| 319      | Forward primer for creation of U25C mutation in <i>bgaB</i> plasmid               | 5'- ACAGCAATTTTCGCGTTACCTG                                                                                                                                                                                                                                                                                                                                            |
| 320      | Reverse primer for creation of U25C mutation in <i>bgaB</i> plasmid               | 5'- GCTAGCGAGAAACAGTAG                                                                                                                                                                                                                                                                                                                                                |
| 323      | 5' end of template for U25C <i>htrA</i> RNA in SHAPE cassette, top strand         | 5'- TTCTAATACGACTCACTATAGGCCTTCGGGCCAAAC<br>AGCAATTTTCGCGTTACCTGTTAATCGAGATTGAAAC                                                                                                                                                                                                                                                                                     |
| 324      | 5' end of template for AAAAA <i>htrA</i> RNA in SHAPE cassette, top strand        | 5'- TTCTAATACGACTCACTATAGGCCTTCGGGCCAAAC<br>AGCAAAAAAACGTTACCTGTTAATCGAGATTGAAAC                                                                                                                                                                                                                                                                                      |
| 341      | 5' end of template for U23C <i>htrA</i> RNA in SHAPE cassette, top strand         | 5'- TTCTAATACGACTCACTATAGGCCTTCGGGCCAAAC<br>AGCAATCTTGC GTTACCTGTTAATCGAGATTGAAAC                                                                                                                                                                                                                                                                                     |
| 342      | 5' end of template for G28A <i>htrA</i> RNA in SHAPE cassette, top strand         | 5'- TTCTAATACGACTCACTATAGGCCTTCGGGCCAAAC<br>AGCAATTTTGCATTACCTGTTAATCGAGATTGAAAC                                                                                                                                                                                                                                                                                      |
| 348      | 5' end of template for U40C <i>htrA</i> RNA in SHAPE cassette, top strand         | 5'- TTCTAATACGACTCACTATAGGCCTTCGGGCCAAAC<br>AGCAATTTTGC GTTACCTGTTAACCAGATTGAAAC                                                                                                                                                                                                                                                                                      |
| 349      | 3' end of template for U40C <i>htrA</i> RNA in SHAPE cassette, bottom strand      | 5'-GAACCGGACCGAAGCCCGATTGGCTTCGGCGAACC<br>GAAGCTTTTTTCATGTGTTTCAATCTCGGTTAACAGG                                                                                                                                                                                                                                                                                       |
| 275      | gBlock dsDNA used for <i>htrAp1</i> RNA in SHAPE cassette                         | 5'-GATGCCGGGAATTCTAATACGACTCACTATAGGCCTTCGGGCCAAGTCGGTTGATTTCAGGA<br>TTATATCAGCGGGATGACTGACCTTTACGCATGGGATGAATATCGGCGTTTGATGGCGGTTCGA<br>ACAGTAAATGGACTTTTGTAAGATGGACAATAAATTTTACTTTTTCCAGAACTTTGTTCCG<br>GAACTTCGCGTTATAAAATGAATCTGACGTACACAGCAATTTTGC GTTACCTGTTAATCGAGA<br>TTGAAACACATGAAAAAGCTTCGGTTCGCCGAAGCCAAATCGGGCTTCGGTCCGGTTCGCGAG<br>TTAACGGATCTCTAGACGCG |

A

|                              |                                                  |
|------------------------------|--------------------------------------------------|
| S_Enteritidis str. P125109   | ACAGCAATTTTTCGCGTTACCTGTTAATCGAGATTGAAACACATGAAA |
| S_Typhimurium str. LT2       | ACAGCAATTTTTCGCGTTACCTGTTAATCGAGATTGAAACACATGAAA |
| S_Typhi str. CT18            | ACAGCAATTTTTCGCGTTACCTGTTAATCGAGATTGAAACACATGAAA |
| S_Paratyphi_A str. ATCC 9150 | ACAGCAATTTTTCGCGTTACCTGTTAATCGAGATTGAAACACATGAAA |
| S_Paratyphi_B str. SPB7      | ACAGCAATTTTTCGCGTTACCTGTTAATCGAGATTGAAACACATGAAA |
| S_Paratyphi_C str. RKS4594   | ACAGCAATTTTTCGCGTTACCTGTTAATCGAGATTGAAACACATGAAA |
| S_diarizonae str. 11-01853   | ACAGCAATTTTTCGCGTTACCTGTTAATCGAGATTGAAACACATGAAA |
| S_arizonae ser. 62:z4,z23:-- | ACAGCAATTTTTCGCGTTACCTGTTAATCGAGATTGAAACACATGAAA |
| S_bongori str. NCTC 12419    | ACAGCAATTTTTCGCGTTACCTGTTAATCGAGACTGAAACACATGAAA |
| E_coli_K12 str. K-12, MG1655 | ACAGCAATTTTTCGCGTTATCTGTTAATCGAGACTGAAATACATGAAA |
| E_coli_O157_H7 str. EDL933   | ACAGCAATTTTTCGCGTTATCTGTTAATCGAGACTGAAATACATGAAA |

fourU                      SD                      start codon

stem                      loop                      stem

B

|               |     |                                                                                   |  |
|---------------|-----|-----------------------------------------------------------------------------------|--|
|               |     | <i>htrAp1</i>                                                                     |  |
|               |     | ↗                                                                                 |  |
| S_Enteritidis | 1   | GTCGGTTGATTTCAGGATTATATCAGCGGGATGACTGACCTTTACGCATGGGATGAATATCGGCGTTTGATGGCGGTCGAA |  |
| S_Typhimurium | 1   | GTCGGTTGATTTCAGGATTATATCAGCGGGATGACTGACCTTTACGCATGGGATGAATATCGGCGTTTGATGGCGGTCGAA |  |
| S_Typhi       | 1   | GTCGGTTGATTTCAGGATTATATCAGCGGGATGACTGACCTTTACGCATGGGATGAATATCGGCGTTTGATGGCGGTCGAA |  |
| S_ParatyphiB  | 1   | GTCGGTTGATTTCAGGATTATATCAGCGGGATGACTGACCTTTACGCATGGGATGAATATCGGCGTTTGATGGCGGTCGAA |  |
| Ecoli_K-12    | 1   | GCCGCTGCTGCAGGATTATATCAGCGGGATGACCGGCTTATGCGTGGGATGAATACCGACGCTGATGGCGGTAGAA      |  |
|               |     | <i>dgt</i> stop codon                                                             |  |
|               |     | ↓                                                                                 |  |
| S_Enteritidis | 81  | CAGTAAATGGACTTTTGTAAAGATGGACAATAAATTTTACTTTTTCCAGAACTTTGTTCCGGAACCTTCGCGTTATAAA   |  |
| S_Typhimurium | 81  | CAGTAAATGGACTTTTGTAAAGATGGACAATAAATTTTACTTTTTCCAGAACTTTTATCCGGAACCTTCGCGTTATAAA   |  |
| S_Typhi       | 81  | CAGTAAATGGACTTTTGTAAAGATGGACAATAAATTTTACTTTTTCCAGAACTTTTATCCGGAACCTTCGCGTTATAAA   |  |
| S_ParatyphiB  | 81  | CAGTAAATGGACTTTTGTAAAGATGGACAATAAATTTTACTTTTTCCAGAACTTTGTTCCGGAACCTTCGCGTTATAAA   |  |
| Ecoli_K-12    | 81  | CAATAACCAGGCTTTTGTAAAGACGAACAATAAATTTTACTTTTTCCAGAACTTTAGTTCCGGAACCTTCAGGCTATAAA  |  |
|               |     | <i>htrAp2</i> <i>htrAp3</i> thermometer <i>htrA</i> start codon                   |  |
|               |     | ↗                      ↗                      ↓                                   |  |
| S_Enteritidis | 161 | ATGAATCTGACGTACACACCAATTTTTCGCGTTACCTGTTAATCGAGATTGAAACACATGAAAAAACC              |  |
| S_Typhimurium | 161 | ATGAATCTGACGTACACACCAATTTTTCGCGTTACCTGTTAATCGAGATTGAAACACATGAAAAAACC              |  |
| S_Typhi       | 161 | ATGAATCTGACGTACACACCAATTTTTCGCGTTACCTGTTAATCGAGATTGAAACACATGAAAAAACC              |  |
| S_ParatyphiB  | 161 | ATGAATCTGACGTACACACCAATTTTTCGCGTTACCTGTTAATCGAGATTGAAACACATGAAAAAACC              |  |
| Ecoli_K-12    | 161 | ACGAATCTGAAGAACACACCAATTTTTCGCGTTACTGTTAATCGAGACTGAAATACATGAAAAAACC               |  |

**Supplemental Figure 1. The *htrA* thermometer and upstream sequence is conserved across *Salmonella enterica*, but differs in more diverse prokaryotes. A.** Alignment of the *htrA* thermometer sequence from diverse strains of *S. enterica* with the corresponding sequence from *S. bongori* and *E. coli*. The thermometer sequence is absolutely conserved in the *S. enterica* strains. Sequence differences in *S. bongori* and *E. coli* would be predicted to destabilize the hairpin significantly, as they disrupt a base pair observed in the *S. enterica htrA* hairpin. Sequences were retrieved from GenBank. *S. enterica* subsp. *enterica* serovars include: *S. Enteritidis* str. P125109 (NC\_011294.1), *S. Typhimurium* str. LT2 (NC\_003197.2), *S. Typhi* str. CT18 (NC\_003198.1), *S. Paratyphi A* str. ATCC 9150 (NC\_006511.1), *S. Paratyphi B* str. SPB7 (CP000886.1), and *S. Paratyphi C* str. RKS4594 (NC\_012125.1). Other *S. enterica* subspecies include: *S. enterica* subsp. *diarizonae* str. 11-01853 (CP011289.1) and *S. enterica* subsp. *arizonae* serovar 62:z4,z23:-- (CP000880.1). The *S. bongori* sequence comes from NCTC 12419, culture collection SGSC SARC11 (FR877557.1), while the *E. coli* sequences come from str. K-12 MG1655 (U00096.3) and O157:H7 str. EDL933 (AE005174.2). Strains for the alignment were chosen based on the phylogenetic trees from Desai PT, Porwollik S, Long F, Cheng P, Wollam A, Clifton S, Weinstock GM, McClelland M. 2013. Evolutionary genomics of the *Salmonella enterica* subspecies. mBio 4(2):e00579-12. doi:10.1128/mBio.00579-12.

**B.** Alignment of the extended region upstream of the *htrA* coding region of several *S. enterica* strains with that of *E. coli*. Transcription start sites are noted, with the two upstream start sites in the coding region of the gene *dgt* (stop codon marked). The *S. Enteritidis* sequence was used for the extended sequence in Figure 5.

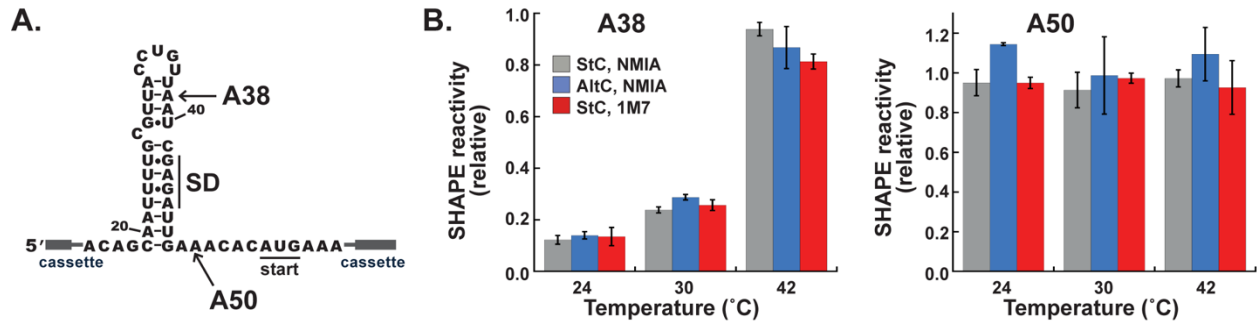

**Supplemental Figure 2. Trends in reactivity with respect to temperature are independent of the structural cassette or of the SHAPE reagent used.** **A.** Position of the nucleotides A38 and A50, shown on the secondary structure of the *htrA* thermometer. **B.** SHAPE results for A38 and A50. A38 is part of the upper stem of the thermometer hairpin, and it is thus predicted to have increased reactivity at elevated temperatures. A50 is predicted to be unpaired at all temperatures. The standard cassette (StC) is the sequence used throughout the rest of the work. Alternate cassette (AltC, shown in blue) used a different sequence in the first hairpin of the 3' end of the structure cassette. Experiments testing the effect of using the SHAPE reagent 1M7 are shown in red. Error bars represent the standard deviation of two to six experiments.

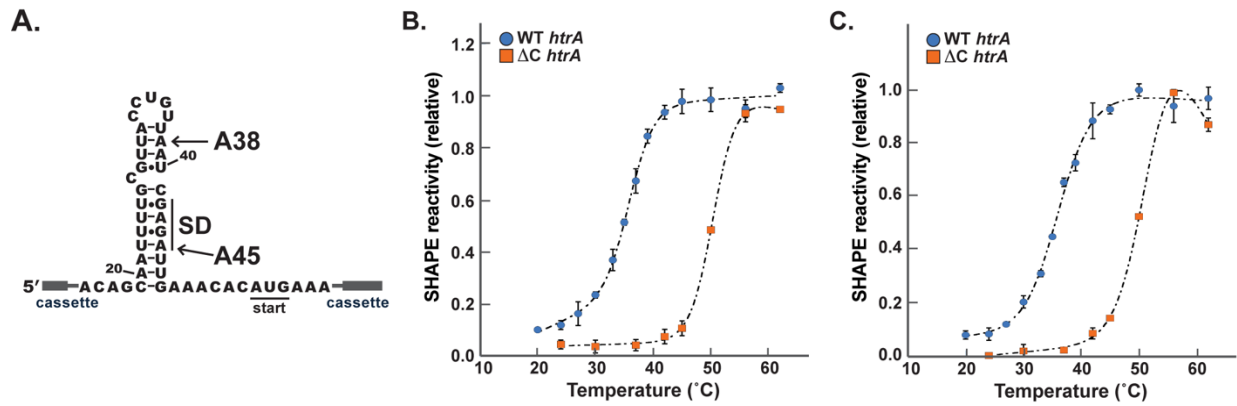

**Supplemental Figure 3. Representative SHAPE melting curves, with error shown. A.** Position of the nucleotides A38 and A45, shown on the secondary structure of the *htrA* thermometer. **B., C.** SHAPE melting curves for A38 (**B**) and A45 (**C**) for the wild-type thermometer (blue circles) and for the  $\Delta C$  mutant (orange squares). Error bars represent the standard deviation of two to six experiments.

**A. wild-type *htrA* (n=6 for 30 °C; n=4 for 42 °C)**

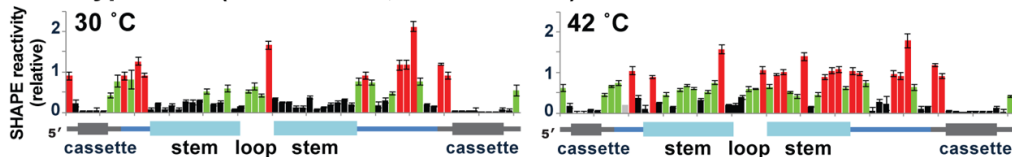

**B.  $\Delta C$  control (n=2)**

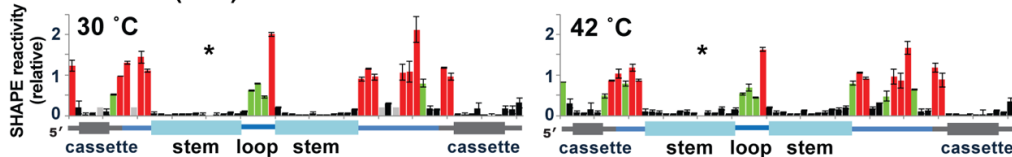

**C. AAAAA (n=2)**

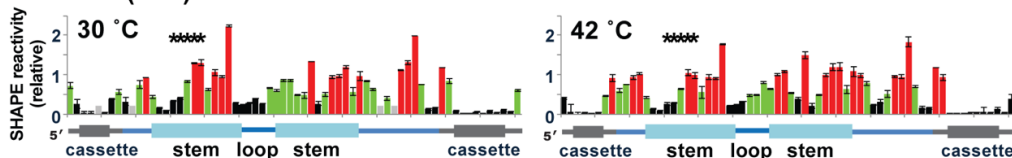

**D. U23C (n=2)**

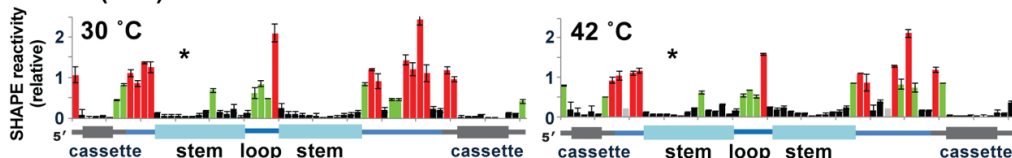

**E. U25C (n=3)**

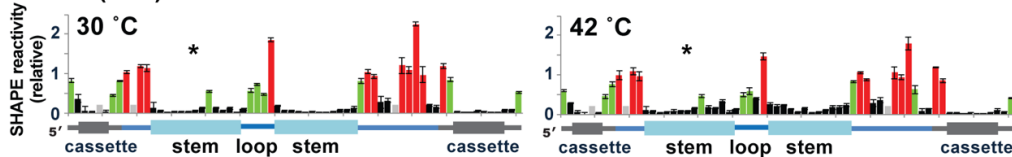

**F. U40C (n=4)**

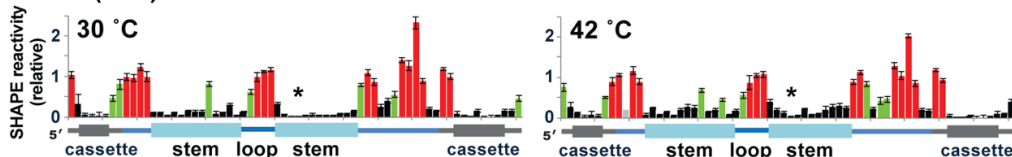

**G. G28A (n=3)**

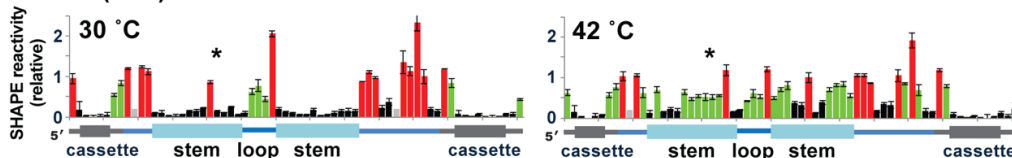

**Supplemental Figure 4. SHAPE data for the *htrA* stem mutants at 30 °C and 42 °C.** Average values for the wild-type *htrA* thermometer and the  $\Delta C$  control are shown in panels **A** and **B**, respectively, for comparison, for comparison with results from the AAAAA mutant (**C**), U23C (**D**), U25C (**E**), U40C (**F**), and G28A (**G**). Positions of mutation(s) have been indicated with an asterisk (for the  $\Delta C$  control, the asterisk marks the site of the missing nucleotide). Coloring as in Figure 2. Positions for which SHAPE values could not be determined due to high background signal are shown in grey. Values are the average of several independent experiments, as marked, with standard deviation indicated with error bars. Negative values are set to zero.
